# Supplementary material
Source: publisher figshare collection journal article supplement (https://frontiersin.figshare.com/ndownloader/files/22806890)
Supplement: Supplementary file [file 22806890]

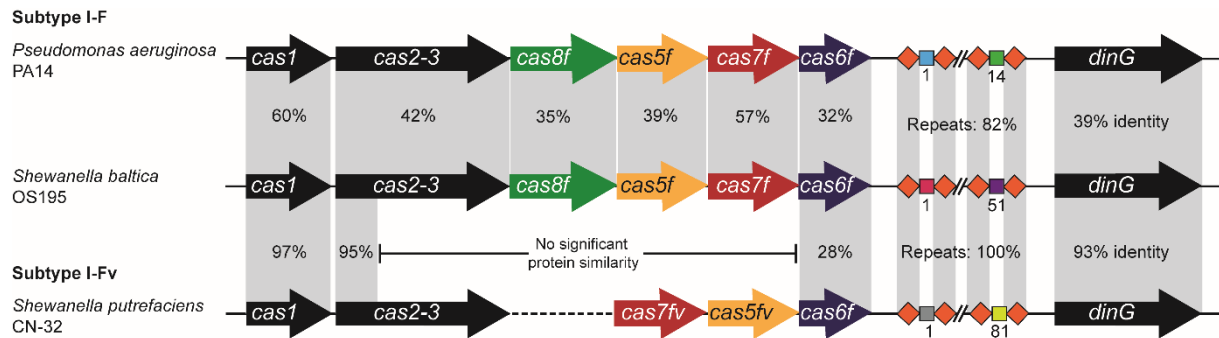

**Supplementary Figure 1. Comparison of the CRISPR-Cas systems from *P. aeruginosa* PA14 and *S. putrefaciens* CN-32 against the I-F system from *S. baltica* OS195.** Schematic representation of the CRISPR-*cas* loci. The arrows indicate the *cas* and related genes in comparative lengths. Cascade genes are multicolored. The CRISPR arrays are indicated as alternating rhombi (orange, CRISPR repeats) and squares of various colors (spacers). Grey highlights indicate sections of significant protein sequence identity and high sequence complementarity (for the repeats).
